# Supplementary material for: Modelling hypersensitivity to trastuzumab defines biomarkers of response in HER2 positive breast cancer
Source: PubMed Central journal article supplement (PMC8496101; doi:10.1186/s13046-021-02098-z), 2021-10-07
Supplement: 13046_2021_2098_MOESM1_ESM.pdf [file 13046_2021_2098_MOESM1_ESM.pdf]

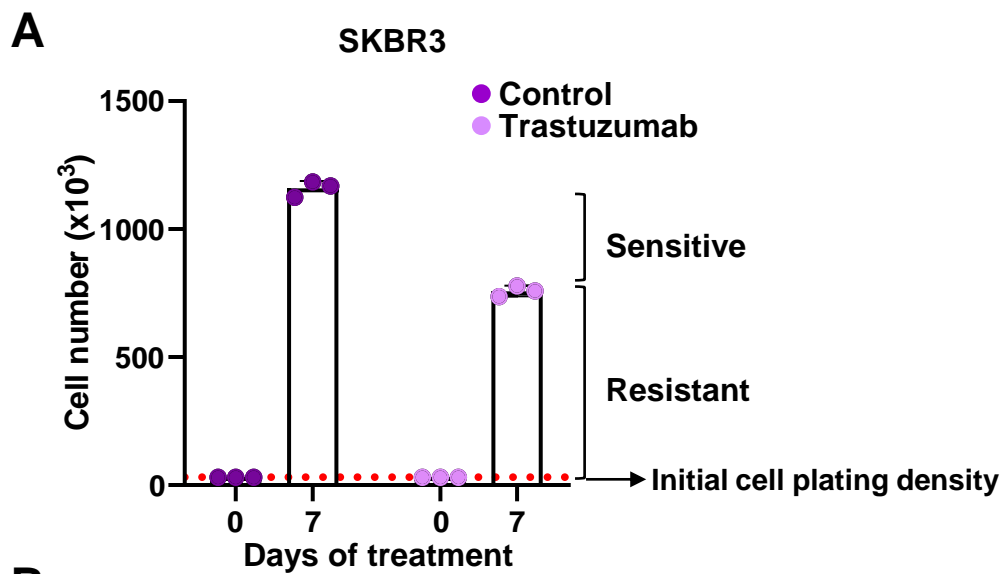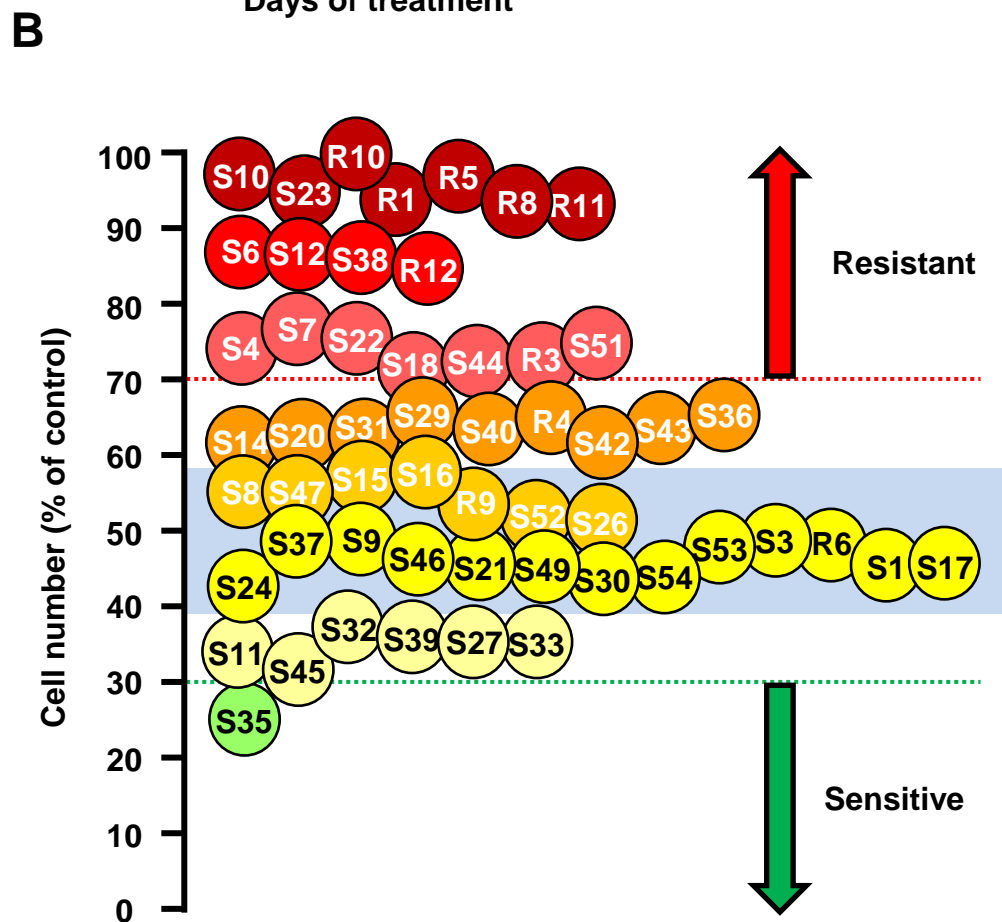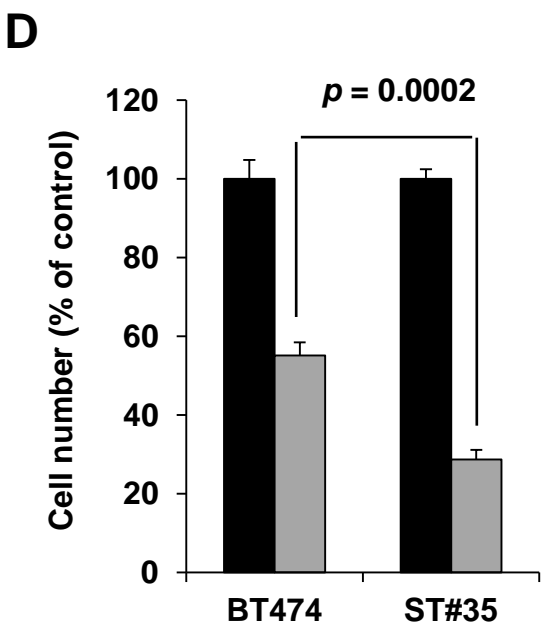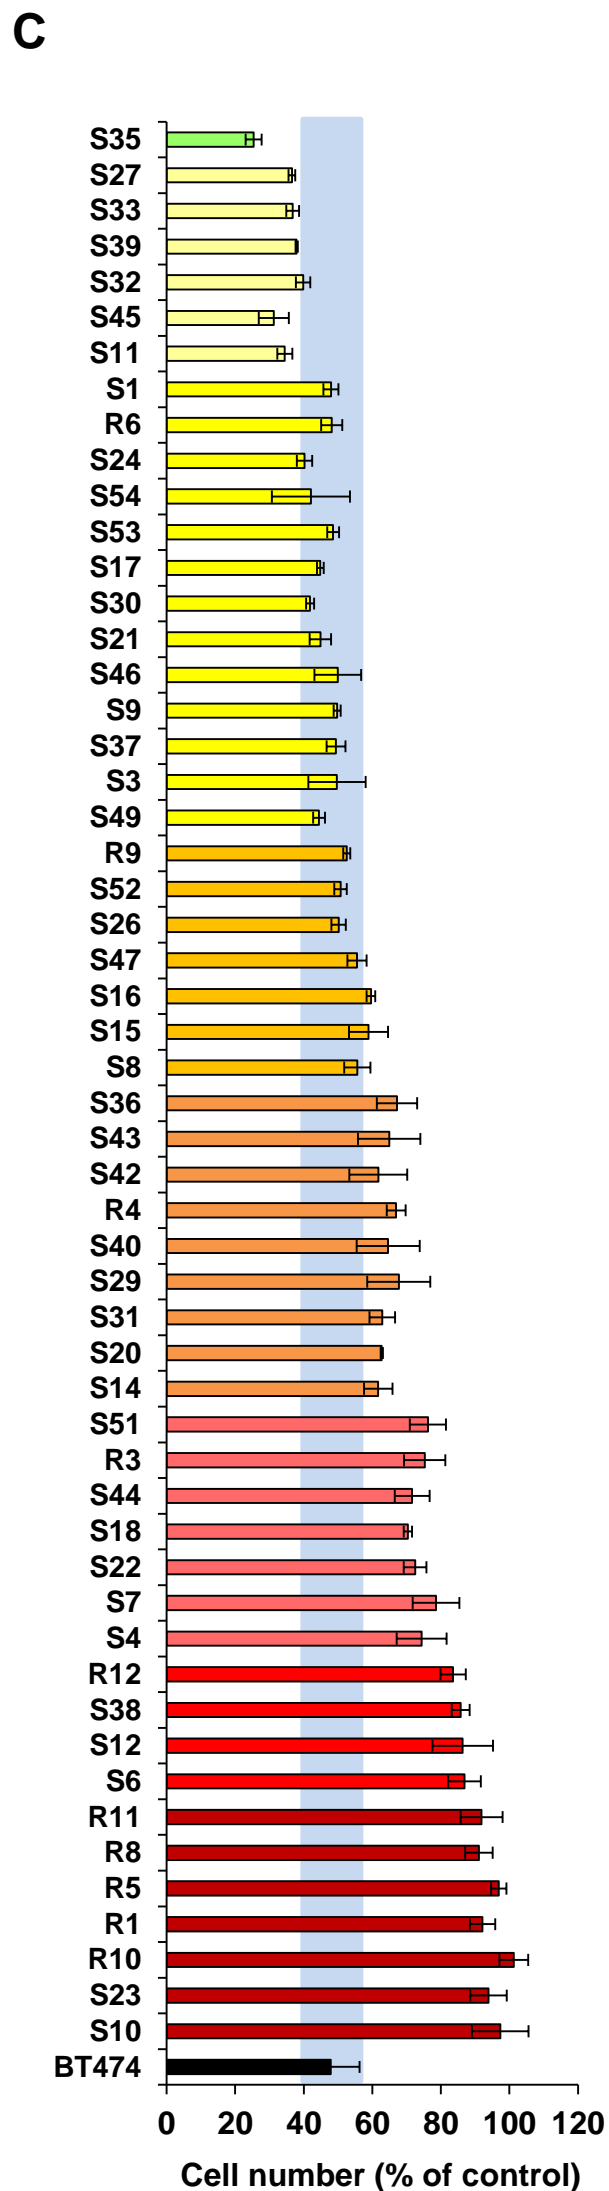

Figure S1
